# Supplementary material
Source: publisher figshare collection journal article supplement (https://acs.figshare.com/ndownloader/files/3888439)
Supplement: Supplementary file 1 [file 3888439]

## **Supplemental Material:**

### **Sensitive Characterization of the Influence of Substrate Interfaces on Supported Thin Films**

Jie Xu, Lei Ding, Jiao Chen, Shiyang Gao, Linling Li, Dongshan Zhou, Xiang Li and Gi Xue\*

Department of Polymer Science and Engineering School of Chemistry and Chemical Engineering, Key Laboratory of High Performance Polymer Materials and Technology (Nanjing University), The State key Laboratory of Coordination Chemistry Nanjing University, Nanjing, 210093, P. R. China

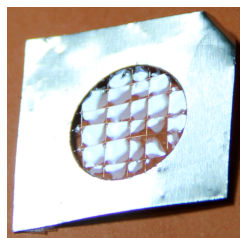

**Figure S1:** Optical image of ultra thin free standing film ( $\sim 25\text{nm}$ ) captured on the aluminum plate with a circular opening of 1.5 cm in diameter. The opening is filled with very fine copper wires to support the ultra thin film.

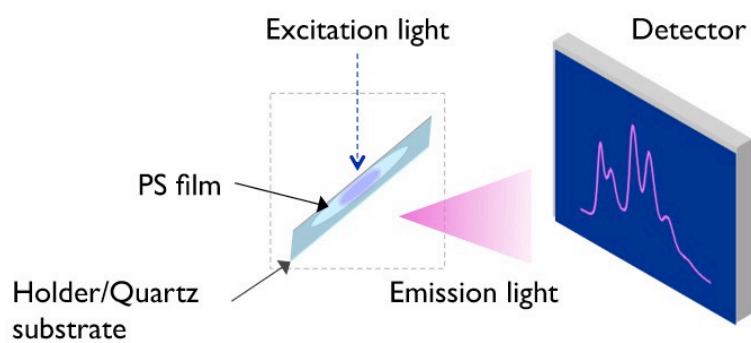

**Figure S2:** Schematic of the optical pathway for fluorescence measurement.

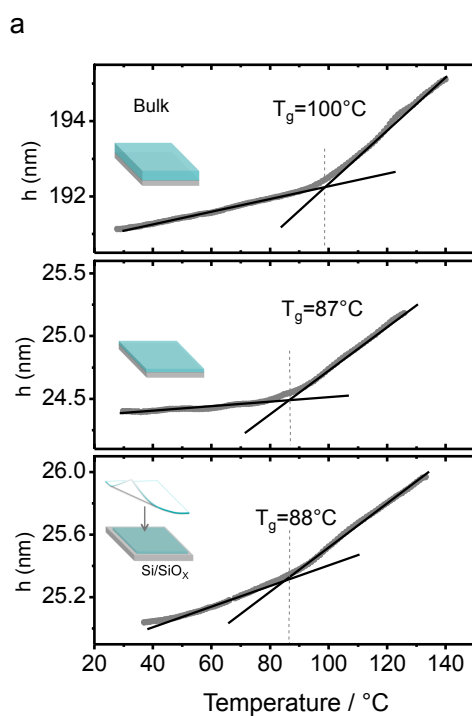

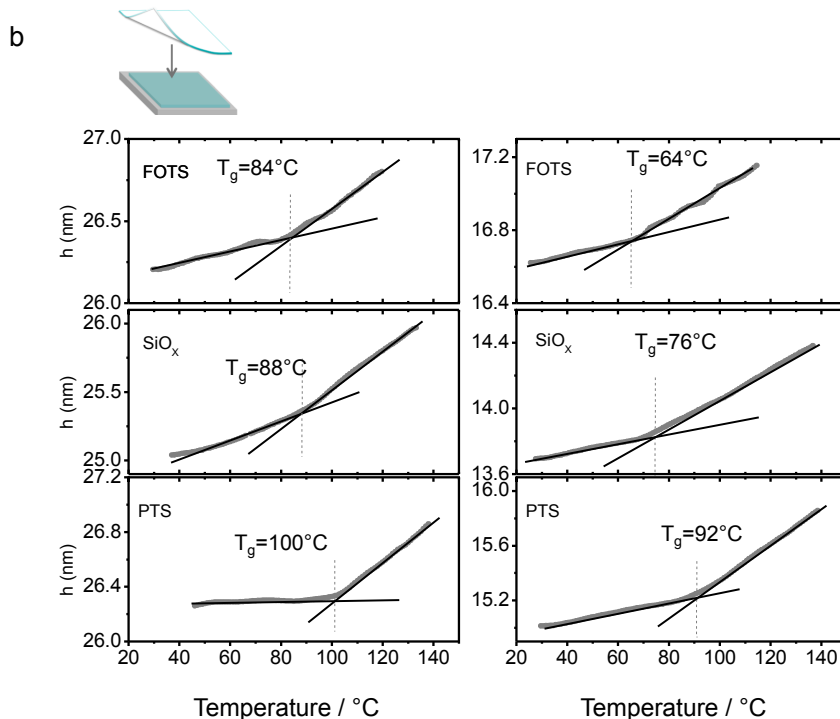

**Figure S3 (a): The film thickness  $h$  of PS films as a function of the sample temperature  $T$ .** Top: a thick film with thickness of 190nm supported on Si substrate. All the film was annealed at 120°C for 24 hours. Middle: thin film with thickness of 25nm spin coated on the Si substrate. Bottom: thin film with thickness of 25nm transferred to Si substrate after annealed. The  $T_g$ s of supported film and transferred film are nearly the same, which is consistent with the results get in Figure 3.**(b):  $T_g$  values of films supported on Si substrate with modified surfaces.** We observed that a much less  $T_g$  reduction in films on phenethyl-group modified substrate, confirming the results in Figure 4.

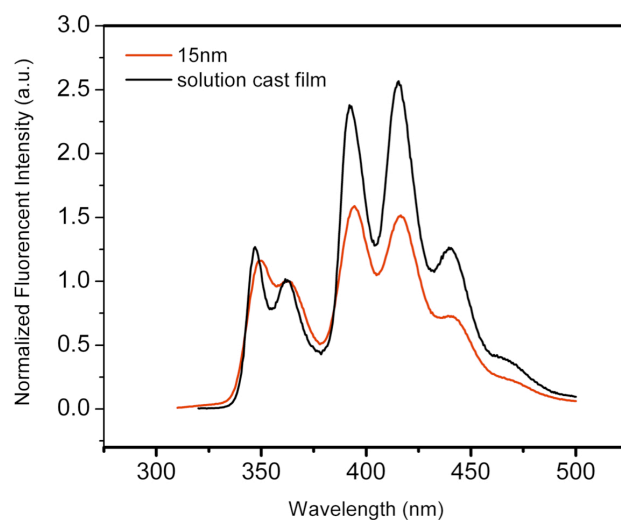

**Figure S4:** NRET ratio  $I_A/I_C$  for a supported thin film (red) and the bulk sample (black).

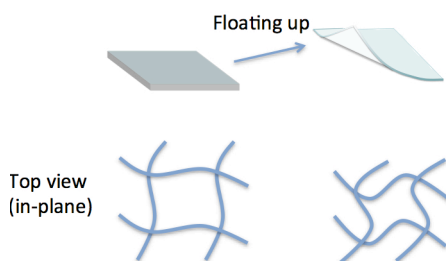

**Schematic 1:** a closer in-plane interchain proximity in freestanding films after removing the supported substrate.

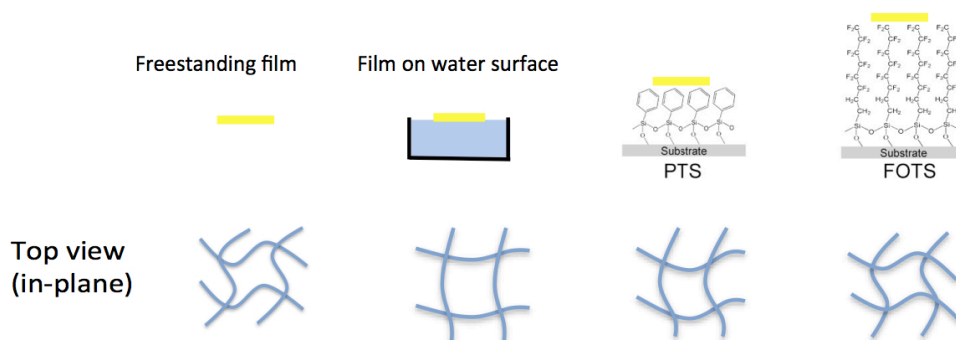

**Schematic 2:** The in-plane interchain proximity in freestanding films, water surface and modified substrate (PTS and FOTS).
